# Supplementary material
Source: publisher figshare collection journal article supplement (https://springernature.figshare.com/ndownloader/files/27832512)
Supplement: Supplementary file [file 27832512]

## Aquatic environment

## Terrestrial environment

Terrestrial  
coconut crab

Aquatic  
decapods

**Hypothesis:** higher  
number of  
alternatively spliced  
constructs in  
studied tissues

Observed:  
proliferation of genes  
with functions that  
overlap with studied  
tissues

Observed: lower  
number of  
alternatively spliced  
constructs in  
studied tissues

Observed:  
proliferation of genes  
with functions that  
overlap with studied  
tissues

Observed: higher  
number of  
alternatively spliced  
constructs in  
studied tissues

Observed: less  
genes with  
functions that  
overlap with studied  
tissues

N/A
